# Supplementary material for: Eyes with Suspicious Appearance of the Optic Disc and Normal Intraocular Pressure: Using Clinical and Epidemiological Characteristics to Differentiate Those with and without Glaucoma
Source: PLoS One. 2016 Jul 19;11(7):e0158983. doi: 10.1371/journal.pone.0158983 (PMC4951128; doi:10.1371/journal.pone.0158983)
Supplement: S1 File — This file presents all raw demographic and ocular data of the 84 pLPC and the 40 NTG eyes included in this study. (XLSX) [file pone.0158983.s001.xlsx]

## Sheet: Sheet1
N - EGF	IDADE 1	SEXO	RACA	# PRONTUARIO	TAMANHO DO DO (OD) 1	RX OD (ES) 1	ESCAVAÇAO VERT OD 1	PAQUI OD 1	indice
1	27	F	W	213529	2.51	-2.25	0.65	535	0
2	55	F	J	218490	2.82	-3.5	0.65	551	0
3	16	F	W	1510158	2.75	-0.5	0.65	507	0
4	46	F	W	341187	2.4	0	0.6	535	0
5	25	M	W	1535699	2.84	0	0.65	618	0
6	53	F	AD	151704	2.6	1.25	0.6	584	0
7	35	M	W	86922	1.78	-0.5	0.6	497	0
8	58	M	O	75831	1.9	1.25	0.65	534	0
9	45	F	W	1526579	3	1	0.65	537	0
10	47	F	W	1504826	2.2	-1	0.6	562	0
11	25	F	W	1504826	2.35	0	0.65	531	0
12	20	M	W	183910	2.67	-0.75	0.6	476	0
13	51	M	AD	1509678	3.8	1.75	0.7	517	0
14	41	M	W	154543	2.2	-0.5	0.6	551	0
15	50	M	W	1509043	2.51	2.5	0.75	533	0
16	50	M	W	1528213	3.9	0	0.6	551	0
17	47	F	W	125478	1.8	-1	0.6	562	0
18	51	M	J	89713	2.5	-1.5	0.75	515	0
19	56	M	W	51748	2.6	0.25	0.7	498	0
20	52	F	W	177740	2.35	1.25	0.7	519	0
21	37	F	W	1518967	1.48	-0.5	0.6	512	0
22	29	F	O	1510086	2.4	-1.5	0.75	548	0
23	24	F	W	171456	3.87	-0.5	0.8	473	0
24	21	M	W	1513443	1.9	0.5	0.6	521	0
25	62	M	W	1518050	1.91	-0.75	0.6	551	0
26	37	M	W	164912	2.15	-4	0.7	542	0
27	68	F	W	218147	2.4	1.75	0.6	565	0
28	67	F	W	1508916	2.7	0.25	0.6	519	0
29	21	M	W	189351	2.11	-1	0.6	523	0
30	21	F	W	1502439	2.34	-1.5	0.6	484	0
31	64	M	W	214716	2.01	0	0.6	537	0
32	47	F	AD	214897	4.2	0	0.75	536	0
33	43	M	W	1528986	3	0	0.75	544	0
34	47	F	J	169583	2.36	-2.5	0.6	543	0
35	54	M	AD	179771	1.87	1	0.6	496	0
36	50	M	O	1525009	4.1	1.25	0.9	546	0
37	53	F	W	138941	4.2	-0.5	0.8	537	0
38	71	F	W	1501399	2.3	4	0.7	535	0
39	58	M	O	165700	2.5	2	0.6	513	0
40	59	M	W	50896	3.2	-1.75	0.7	535	0
41	22	F	W	1520933	2.6	-4	0.6	474	0
42	66	F	O	1509842	2.35	-3	0.6	632	0
43	46	M	W	1507893	1.48	-0.5	0.65	515	0
44	58	M	O	76502	1.8	-3.5	0.75	570	0
45	44	F	AD	1514378	3.87	0	0.6	538	0
46	48	F	AD	215247	1.9	0	0.6	534	0
47	37	M	W	1512323	1.91	0	0.7	551	0
48	52	M	W	1512144	2.15	0	0.8	499	0
49	63	F	W	174867	2.5	2.75	0.85	550	0
50	64	F	W	177081	2.3	1.25	0.7	535	0
51	71	F	W	109181	2.11	2.75	0.6	552	0
52	73	F	W	112211	2.47	1.5	0.7	536	0
53	66	F	W	217161	2.01	1	0.6	530	0
54	78	F	W	214891	2	-9.5	0.6	580	0
55	48	F	W	213929	2.72	1.75	0.6	600	0
56	33	F	J	1527366	2.47	-0.5	0.6	568	0
57	46	F	AD	1523498	1.5	-1	0.65	536	0
58	35	F	W	20341	4.1	-0.5	0.65	480	0
59	78	F	W	1522635	2.87	-8	0.6	580	0
60	58	F	W	1512619	2.51	2	0.6	540	0
61	30	F	W	43109	3.1	0.25	0.7	536	0
62	39	F	W	1522398	2.4	0	0.8	510	0
63	25	M	W	1525411	4.43	-0.75	0.8	568	0
64	37	M	W	1500965	2.47	0	0.7	555	0
65	55	F	AD	161790	2.52	1.5	0.6	502	0
66	41	F	W	200627	3.8	-0.75	0.65	453	0
67	50	F	J	155644	2.19	-2.5	0.6	485	0
68	47	M	W	1515859	2.58	1	0.6	536	0
69	61	F	J	1502024	1.99	-1.75	0.6	551	0
70	55	F	O	215344	3.7	0.75	0.75	520	0
71	47	M	W	214028	2.38	0	0.6	560	0
72	29	F	W	1526217	1.87	0	0.6	545	0
73	56	M	AD	83955	2.47	0	0.6	563	0
74	38	F	W	200266	2.19	-2.25	0.6	584	0
75	46	F	W	216140	2.1	0	0.6	536	0
76	41	F	W	34857	2.3	0	0.6	470	0
77	53	F	O	1540979	2.49	0.25	0.8	543	0
78	52	F	W	1542067	2.47	-0.25	0.65	503	0
79	47	F	AD	186422	3.59	0.25	0.75	513	0
80	32	M	AD	219168	2.62	-1.5	0.6	568	0
81	66	M	J	149042	3.19	2.75	0.75	569	0
82	22	F	W	195844	1.7	-3	0.6	589	0
83	24	F	W	1548883	3.8	-0.5	0.7	592	0
84	46	M	W	1523400	2.4	0	0.65	515	0
N - NTG	IDADE 1	SEXO	RACA	# PRONTUARIO	TAMANHO DO DO (OD) 1	RX OD (ES) 1	ESCAVAÇAO VERT OD 1	PAQUI OD 1	indice
1	42	F	W	210979	1.96	0	0.6	508	1
2	76	M	W	1498108	2.66	-0.5	0.7	525	1
3	57	M	AD	206898	1.79	0	0.8	515	1
4	47	F	J	61625	1.87	-2.5	0.8	533	1
5	65	F	AD	526703	1.8	3	0.7	575	1
6	58	M	W	91503	1.96	1.75	0.75	470	1
7	44	F	W	87659	2.34	1	0.7	535	1
8	43	M	J	34391	1.39	-0.5	0.8	560	1
9	44	F	J	216558	2.57	-5.5	0.8	529	1
10	41	M	W	199822	2.64	-1	0.9	527	1
11	56	F	AD	94328	1.41	-3.25	0.8	502	1
12	46	M	W	1497278	1.85	-1.25	0.6	527	1
13	49	M	J	201092	1.9	0	0.8	519	1
14	69	F	J	174848	2.16	0	0.9	595	1
15	57	F	W	1500369	2.38	-17	0.65	551	1
16	72	F	W	1531514	1.7	3	0.7	530	1
17	44	M	J	15585	3.01	-8	0.7	519	1
18	25	F	W	212117	2.35	-4.5	0.7	520	1
19	63	F	O	217460	1.44	0	0.75	535	1
20	65	M	J	208412	2	3.5	0.7	522	1
21	58	F	O	172007	3.15	-2	0.7	527	1
22	75	M	J	1510507	3.13	1	0.7	484	1
23	72	F	J	510838	1.8	1	0.8	512	1
24	48	F	J	211722	2.33	-3	0.7	527	1
25	32	F	W	50343	2.4	-0.75	0.6	551	1
26	59	F	AD	1524438	1.92	0	0.7	504	1
27	46	F	W	217367	2.32	0.75	0.7	551	1
28	72	F	O	199391	3.64	-1.5	0.8	484	1
29	78	F	J	1514045	1.7	1.5	0.9	580	1
30	58	F	W	1514001	2.16	-1	0.8	525	1
31	52	F	W	114080	1.6	0	0.7	585	1
32	49	F	W	1508484	2.16	3	0.7	526	1
33	65	F	J	1531745	2.5	0	0.6	528	1
34	78	F	W	8715	1.7	2.5	0.7	529	1
35	57	F	W	1547676	2.06	-17	0.65	551	1
36	70	F	W	126835	1.5	1.5	0.6	469	1
37	40	F	O	141246	4.15	-3	0.6	527	1
38	77	M	W	518113	2.6	-2	0.8	538	1
39	69	M	J	46855	2.3	-1	0.8	551	1
40	67	M	O	1510182	2.17	0	0.7	526	1
